# Supplementary material
Source: PubMed Central journal article supplement (PMC6437012)
Supplement: NIHMS1016544-supplement-Supporting_Information_for_publication.pdf [file NIHMS1016544-supplement-Supporting_Information_for_publication.pdf]

## **Supporting Information**

### **Defining the Role of Nucleotide Flipping in Enzyme Specificity using $^{19}\text{F}$ NMR**

Blaine J. Dow, Shuja S. Malik, Alexander C. Drohat\*

Department of Biochemistry and Molecular Biology, University of Maryland School of Medicine, Baltimore, Maryland 21201, United States

**Table S1. Thymine excision activity of TDG<sup>S2-308</sup> at 37 °C**

| Substrate | $k_{\max}$ (min <sup>-1</sup> ) | $k_{\max}$ relative to G·TGG |
|-----------|---------------------------------|------------------------------|
| G·TGG     | 1.36 ± 0.09                     | -                            |
| G·TGA     | 0.70 ± 0.02                     | 1/ 1.9                       |
| G·TGC     | 0.98 ± 0.04                     | 1/ 1.4                       |
| G·TGT     | 0.72 ± 0.03                     | 1/ 1.9                       |
| G·TAG     | 0.283 ± 0.006                   | 1/ 4.8                       |
| G·TAA     | 0.056 ± 0.002                   | 1/ 24                        |
| G·TAC     | 0.062 ± 0.007                   | 1/ 22                        |
| G·TAT     | 0.092 ± 0.001                   | 1/ 15                        |
| G·TCG     | 0.095 ± 0.001                   | 1/ 14                        |
| G·TCA     | 0.0118 ± 0.0002                 | 1/ 115                       |
| G·TCC     | 0.0117 ± 0.0003                 | 1/ 116                       |
| G·TCT     | 0.054 ± 0.001                   | 1/ 25                        |
| G·TTG     | 0.0169 ± 0.0004                 | 1/ 80                        |
| G·TTA     | 0.0060 ± 0.0002                 | 1/ 227                       |
| G·TTC     | 0.0046 ± 0.0001                 | 1/ 296                       |
| G·TTT     | 0.0109 ± 0.0002                 | 1/ 125                       |

$k_{\max}$  values represent the mean and standard deviation for at least three independent single turnover kinetics experiments. Data fitting is shown in Supporting Information Figure S1.

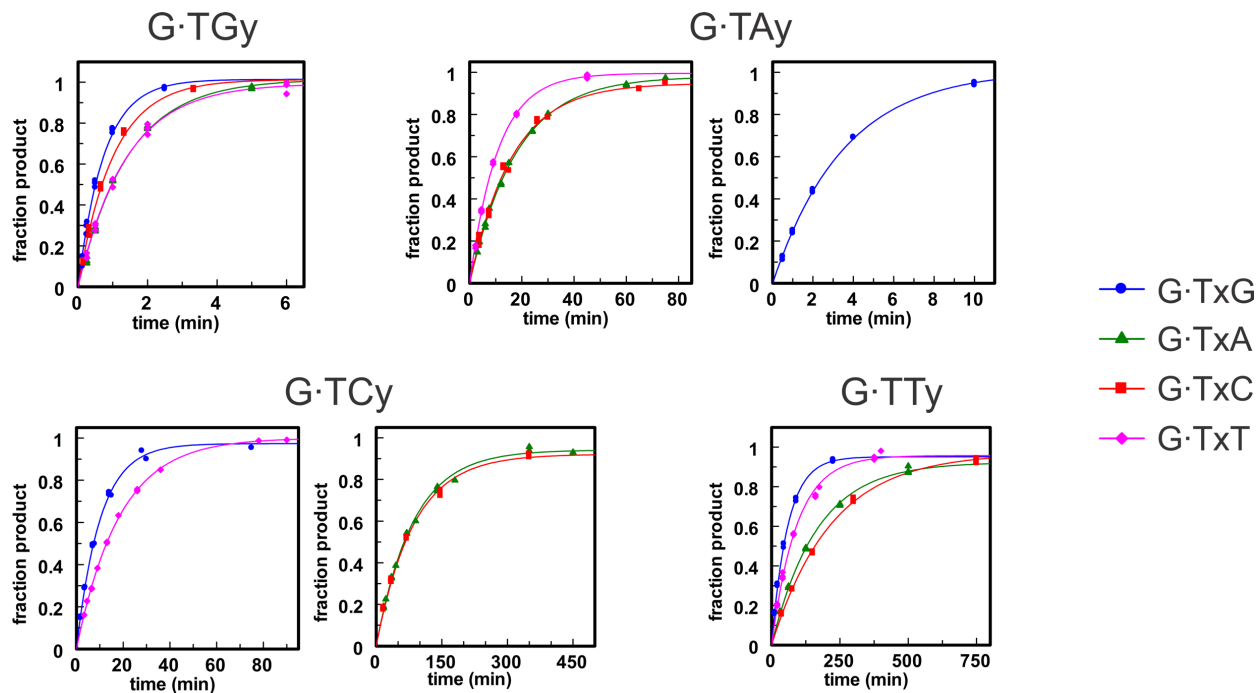

**Figure S1.** Thymine excision activity ( $k_{\max}$ ) of TDG<sup>82-308</sup> for G·Txy substrates. Single turnover kinetics experiments were performed at 37 °C using a saturating enzyme concentration. Data were fitted to a single exponential equation (eq. 2) and the resulting rate constants ( $k_{\max}$ ) are shown in Supporting Information Table S1. The panes are grouped according to the +1 base, and the fitted curves and data points are colored according to the base at the +2 site of the DNA, as shown in the key. For example, blue is used for the four G·TxG substrates (G·TGG, G·TAG, G·TCG, G·TTG).

**Table S2. Thymine excision activity of TDG<sup>S2-308</sup> and two variants at 37 °C**

| Enzyme    | Substrate | $k_{\max}$ (min <sup>-1</sup> ) | $k_{\max}$ relative to G·TG (or G·UG) |
|-----------|-----------|---------------------------------|---------------------------------------|
| TDG       | G·TG      | 0.72 ± 0.03                     | 1                                     |
| TDG       | G·TA      | 0.092 ± 0.001                   | 1/ 7.8                                |
| TDG       | G·TC      | 0.054 ± 0.001                   | 1/ 13                                 |
| TDG       | G·TT      | 0.0109 ± 0.0002                 | 1/ 65                                 |
| A145G-TDG | G·TG      | 9.0 ± 0.3                       | 1                                     |
| A145G-TDG | G·TA      | 1.16 ± 0.04                     | 1/ 7.8                                |
| A145G-TDG | G·TC      | 0.69 ± 0.04                     | 1/ 13                                 |
| A145G-TDG | G·TT      | 0.144 ± 0.004                   | 1/ 64                                 |
| Q278A-TDG | G·TG      | 0.31 ± 0.05                     | -                                     |
| Q278A-TDG | G·TA      | 0.164 ± 0.007                   | 1/ 1.9                                |
| Q278A-TDG | G·TC      | 0.050 ± 0.002                   | 1/ 6.2                                |
| Q278A-TDG | G·TT      | 0.0234 ± 0.0006                 | 1/ 14                                 |
| TDG       | G·UG      | 6.1 ± 0.6                       | 1                                     |
| TDG       | G·UA      | 2.42 ± 0.06                     | 1/ 2.5                                |
| TDG       | G·UC      | 2.64 ± 0.09                     | 1/ 2.3                                |
| TDG       | G·UT      | 0.50 ± 0.03                     | 1/ 12                                 |

$k_{\max}$  values represent the mean and standard deviation for at least three independent single turnover kinetics experiments. The G·Tx and G·Ux substrates have a T at the +2 site (G·TxT, G·UxT). Data fitting is shown in Supporting Information Figure S2 (G·Tx) and S4 Figure (G·Ux).

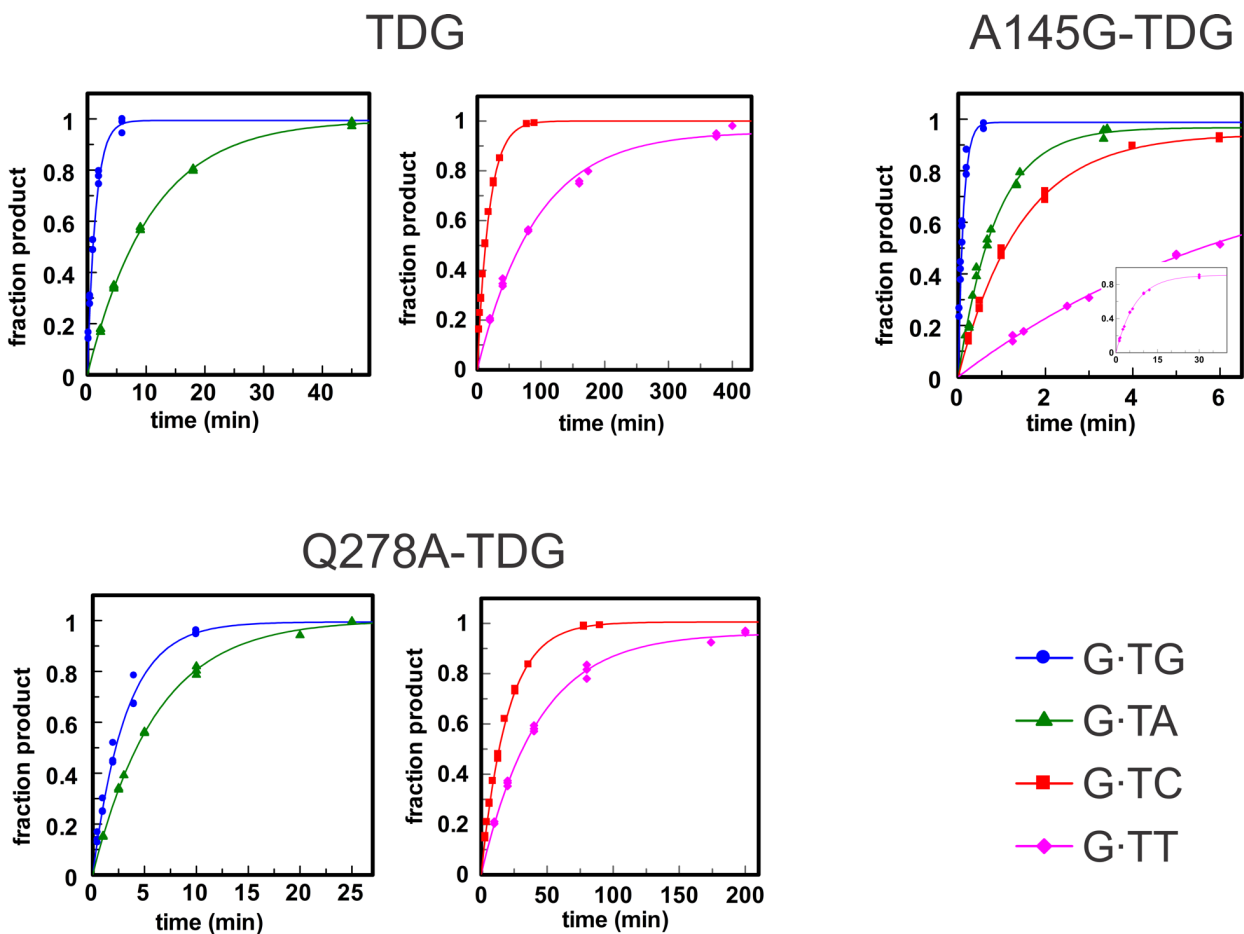

**Figure S2.** Thymine excision activity ( $k_{\max}$ ) of TDG<sup>82-308</sup> and two variants for G·Tx substrates. Single turnover kinetics experiments were performed at 37 °C using a saturating enzyme concentration. Data were fitted to a single exponential equation (eq. 2) and the resulting rate constants ( $k_{\max}$ ) are shown in Supporting Information Table S2. The panes are grouped according to enzyme and the fitted curves and data points are colored according to the +1 base of substrate as shown in the key.

**Table S3.  $k_{\max}$  and  $K_{\text{flip}}$  for TDG<sup>S2-308</sup> and A145G variant at 18 °C**

| Enzyme | Substrate | $k_{\max}$ (min <sup>-1</sup> ) | $K_{\text{flip}}$ |
|--------|-----------|---------------------------------|-------------------|
| WT     | G·TGG     | 0.130 ± 0.004                   | 2.1               |
| WT     | G·TGC     | 0.11 ± 0.01                     | 2.1               |
| WT     | G·TGT     | 0.067 ± 0.002                   | 1.4               |
| WT     | G·TAG     | 0.0226 ± 0.0004                 | 0.45              |
| WT     | G·TAT     | 0.0073 ± 0.0004                 | 0.14              |
| A145G  | G·TGG     | 2.4 ± 0.1                       | 30                |
| A145G  | G·TGT     | 1.4 ± 0.1                       | 12                |
| A145G  | G·TAT     | 0.128 ± 0.002                   | 2.0               |
| A145G  | G·TCT     | 0.0542 ± 0.0005                 | 0.46              |
| A145G  | G·TTT     | 0.0089 ± 0.0008                 | 0.57              |

$k_{\max}$  values represent the mean and standard deviation for at least three independent kinetics experiments. Data fitting is shown in Supporting Information Figure S3.

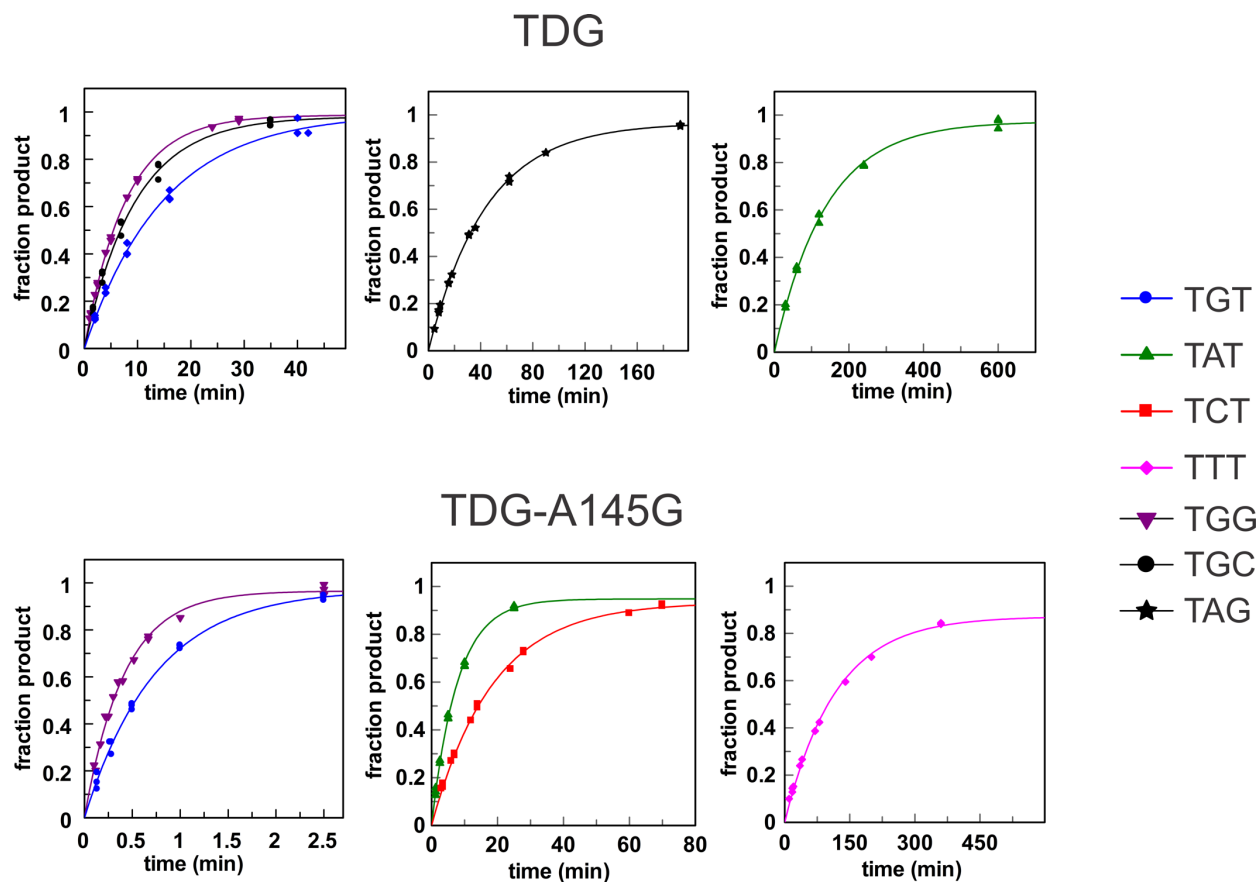

**Figure S3.** Thymine excision activity ( $k_{\max}$ ) of TDG<sup>82-308</sup> and the A145G variant for G·Txy substrates. Single turnover kinetics experiments were performed at 18 °C using a saturating enzyme concentration and the data was fitted to a single exponential equation (eq. 2), with rate constants ( $k_{\max}$ ) provided in Supporting Information Table S3. The panels are grouped according to enzyme and the fitted curves and data points are colored by substrate as indicated in the key.

**Table S4. Glycosylase activity of TDG<sup>82-308</sup> at 18 °C and 37 °C**

| Substrate | $k_{\max}$ 18 °C<br>(min <sup>-1</sup> ) | $k_{\max}$ 37 °C<br>(min <sup>-1</sup> ) | $k_{\max}^{37\text{C}} / k_{\max}^{18\text{C}}$ |
|-----------|------------------------------------------|------------------------------------------|-------------------------------------------------|
| G·TG      | 0.067 ± 0.002                            | 0.72 ± 0.03                              | 11                                              |
| G·TA      | 0.0073 ± 0.0004                          | 0.092 ± 0.001                            | 13                                              |
| G·TC      | 0.0016 ± 0.0001                          | 0.054 ± 0.001                            | 34                                              |
| G·TT      | 0.00025 ± 0.00001                        | 0.0109 ± 0.0002                          | 44                                              |
| G·UG      | 1.40 ± 0.08                              | 6.1 ± 0.6                                | 4                                               |
| G·UA      | 0.54 ± 0.01                              | 2.42 ± 0.06                              | 5                                               |
| G·UC      | 0.52 ± 0.02                              | 2.64 ± 0.09                              | 5                                               |
| G·UT      | 0.070 ± 0.002                            | 0.50 ± 0.03                              | 7                                               |

$k_{\max}$  values represent the mean and standard deviation for at least three independent single turnover kinetics experiments. These G·Tx and G·Ux substrates all contained T at the +2 site (G·TxT, G·UxT). For some substrates the same  $k_{\max}$  values are shown in another table above. Data fitting for G·Ux substrates is shown in Supporting Information Figure S4.



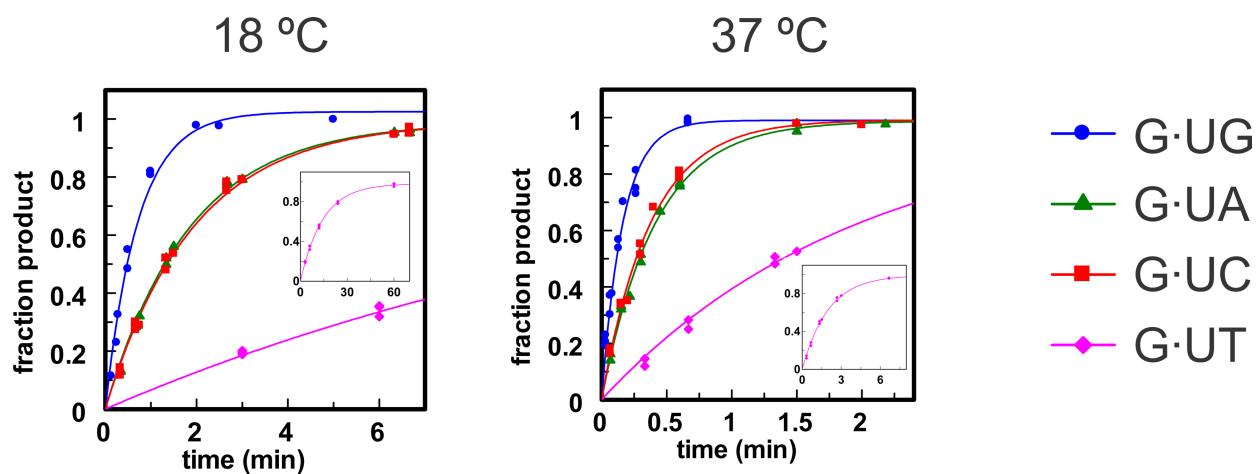

**Figure S4.** Uracil excision activity ( $k_{\max}$ ) of TDG<sup>82-308</sup> for G·Ux substrates. Single turnover kinetics experiments were performed at 18 °C or 37 °C using a saturating enzyme concentration and the data was fitted to a single exponential equation (eq. 2), with rate constants ( $k_{\max}$ ) provided in Supporting Information Table S4. Fitted curves and data points are colored by substrate as shown in the key.
